# Supplementary material for: Fabricating fiber, rice and leaf-shaped TiO2 by tuning the chemistry between TiO2 and the polymer during electrospinning
Source: Royal Society of Chemistry journal article supplement (doi:10.1039/c3ra42250j), 2013-01-01
Supplement: c3ra42250j.pdf [file c3ra42250j.pdf]

# Electronic Supplementary Information (ESI)

## Fiber, Rice and Leaf-shaped TiO<sub>2</sub>-by Tuning the Chemistry between TiO<sub>2</sub> and the Polymer in Electrospinning

G. S. Anjusree,<sup>a</sup> Arun Bhupathi,<sup>a</sup> Avinash Balakrishnan,<sup>a</sup> Sajini Vadukumpully,<sup>a</sup> K.R.V. Subramanian,<sup>a</sup> N. Sivakumar,<sup>a</sup> Seeram Ramakrishna,<sup>b</sup> Shantikumar V Nair<sup>a</sup> and A. Sreekumaran Nair<sup>a\*</sup>

(a) Amrita Centre for Nanosciences and Molecular Medicine

Amrita Institute of Medical Sciences

Amrita Viswa Vidhyapeetham

AIMS Ponekkara PO

Kochi 682041, Kerala, India

E-mail: [sreekumarannair@aims.amrita](mailto:sreekumarannair@aims.amrita)

(b) Centre for Nanofibers and Nanotechnology

Dept. of Mechanical Engineering, National University of Singapore

2 Engineering Drive 3, Singapore 117576

**ESI 1**

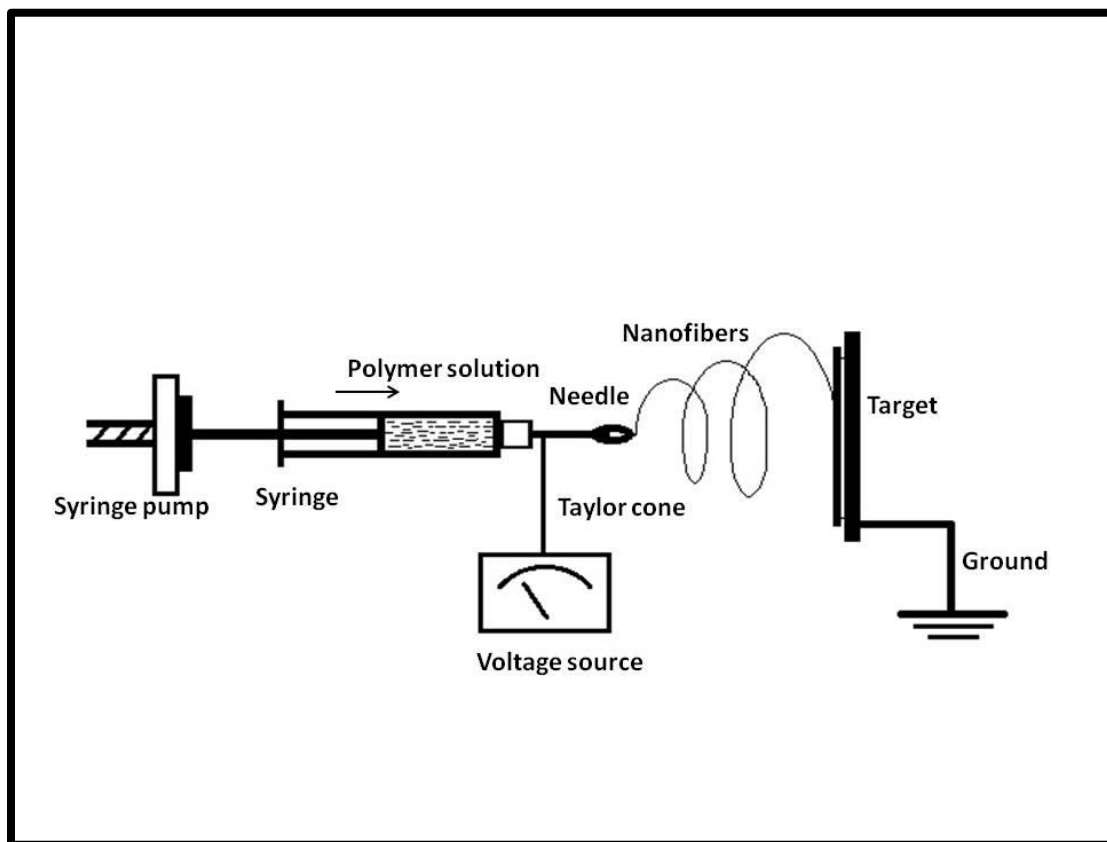

A schematic of the electrospinning set-up. Major components of the electrospinning set-up are shown in the schematic itself.

**ESI 2**

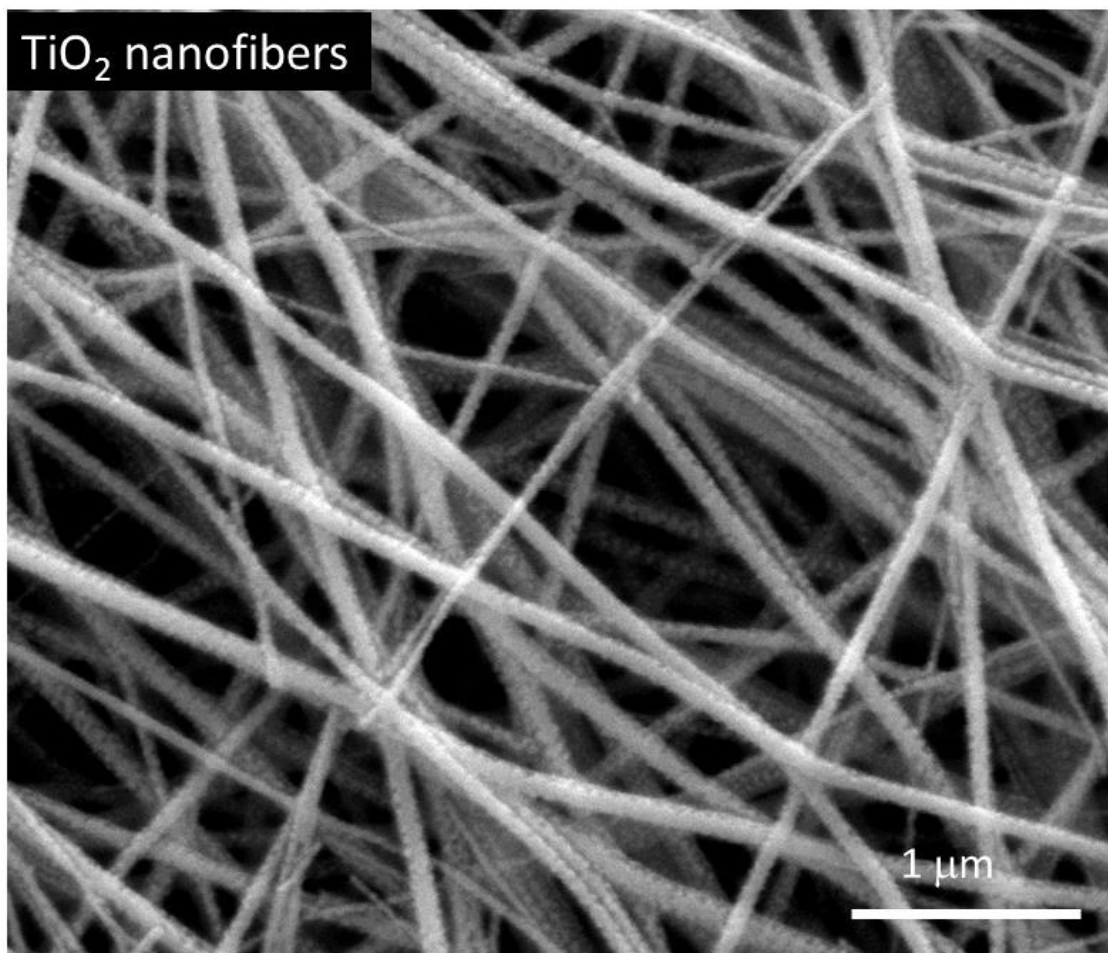

SEM image of the electrospun TiO<sub>2</sub> nanofibers

**ESI 3**

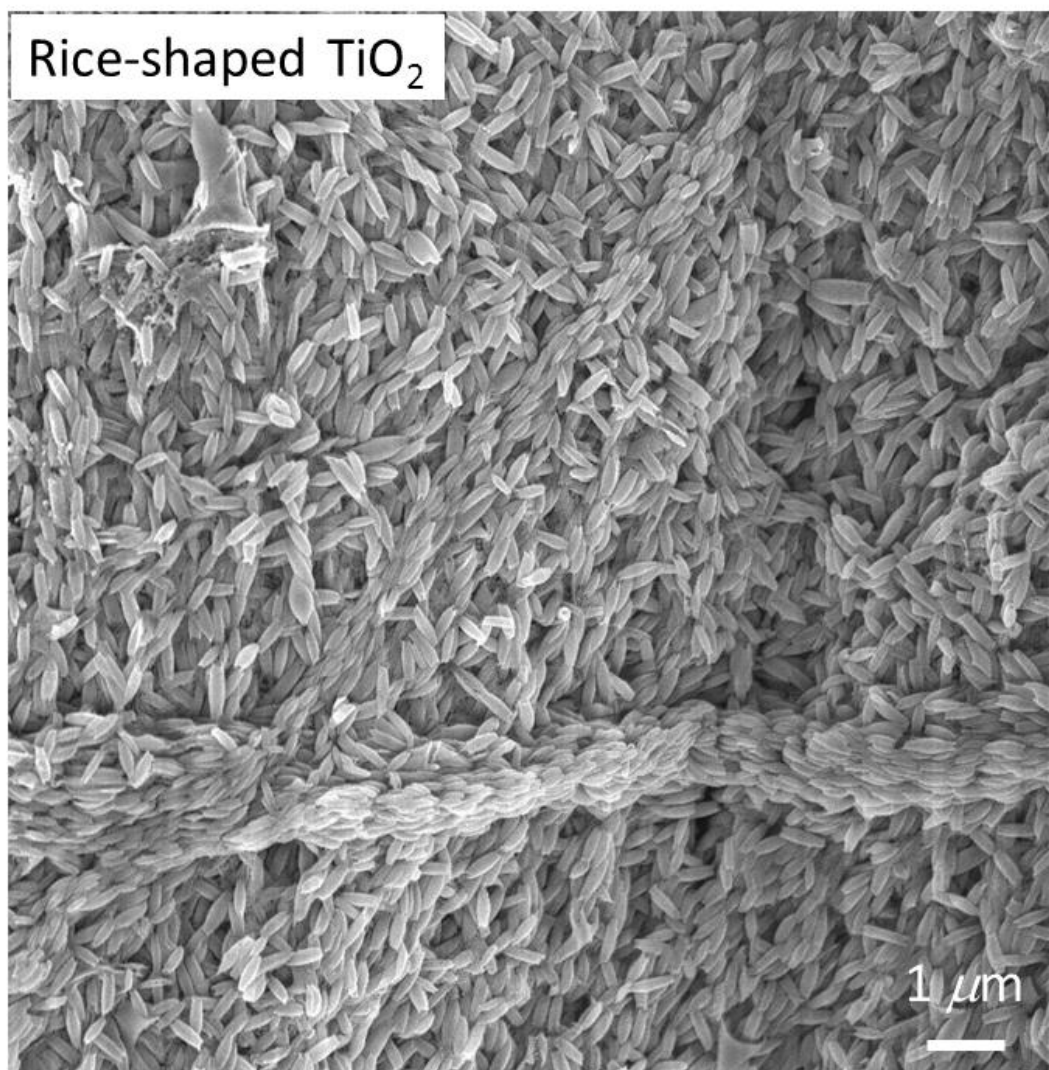

SEM image of the electrospun rice-shaped  $\text{TiO}_2$ .

ESI 4

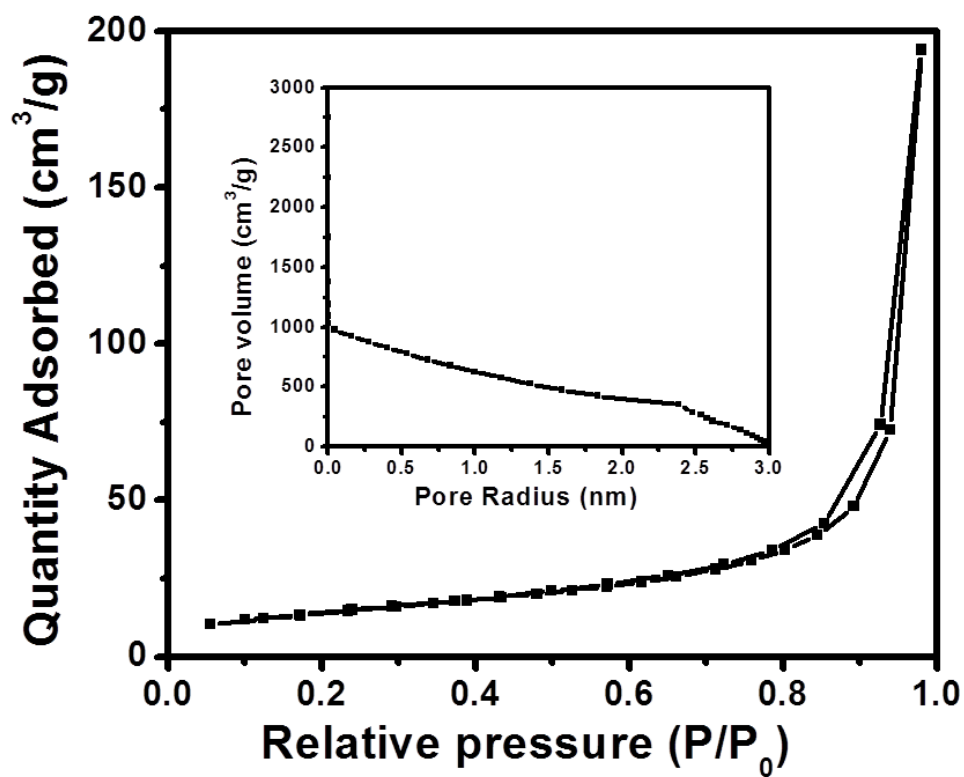

BET surface area plot of the leaf-shaped TiO<sub>2</sub>. Inset shows a plot of the pore size distribution.
